# Supplementary material for: Health, financial and environmental impacts of unnecessary vitamin D testing: a triple bottom line assessment adapted for healthcare
Source: HighWire-hosted journal article supplement (doi:10.1136/bmjopen-2021-056997), 2022-08-01

**Supplementary material for submission titled: The health, financial and environmental impacts of unnecessary vitamin D testing: a triple bottom line assessment adapted for healthcare**

**Figure 1:** PRISMA flow diagram of included studies

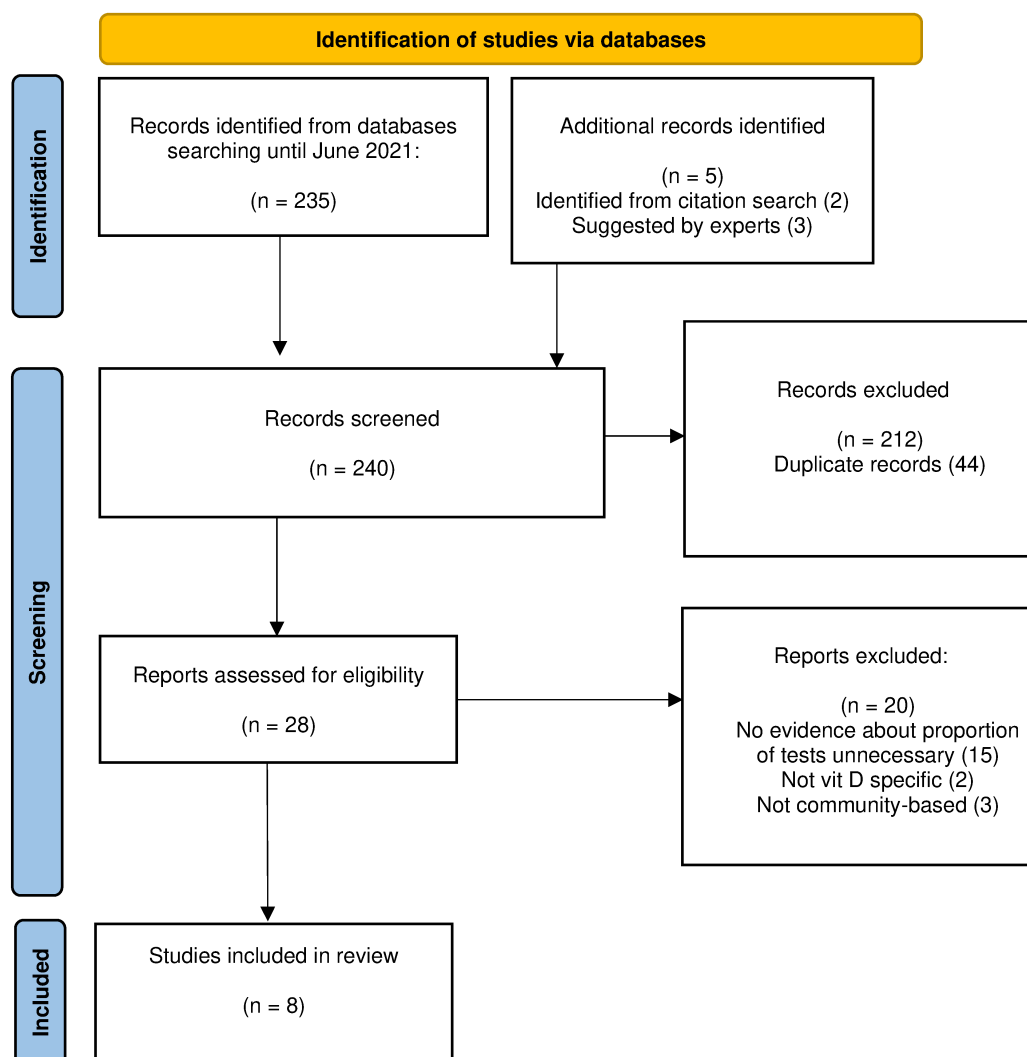

From: Page MJ, McKenzie JE, Bossuyt PM, Boutron I, Hoffmann TC, Mulrow CD, et al. The PRISMA 2020 statement: an updated guideline for reporting systematic reviews. *BMJ* 2021;372:n71. doi: 10.1136/bmj.n71

**Figure 2:** Monthly vitamin D test rates per 100,000 population for all Australian States and Territories in 2018/2019 and 2020 (MBS item numbers 66833-66837).

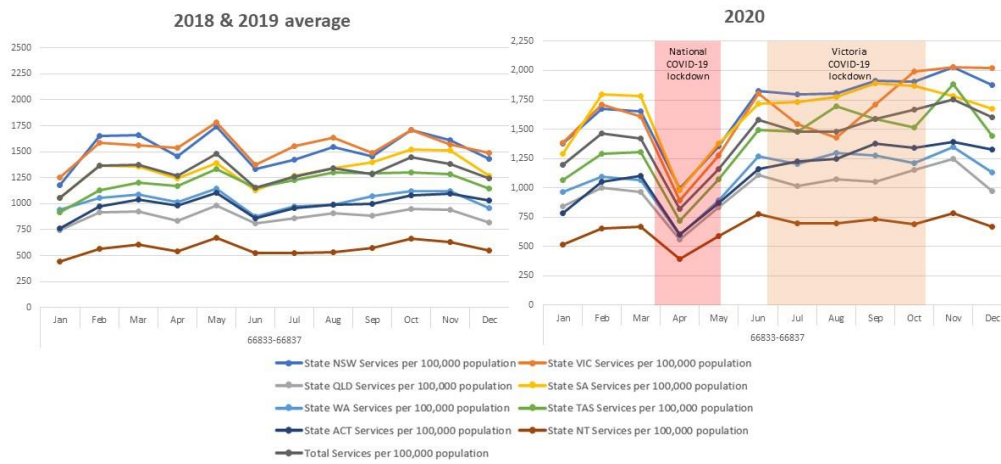

Supplement: bmjopen-2021-056997supp001_data_supplement.pdf [file bmjopen-2021-056997supp001_data_supplement.pdf]
